# Supplementary material for: Catalytic epoxidation of β-ionone with molecular oxygen using selenium-doped silica materials
Source: Royal Society of Chemistry journal article supplement (doi:10.1039/d1nj03311e), 2021-01-01

ESI for

## Catalytic epoxidation of $\beta$ -ionone epoxidation with molecular oxygen on selenium-doped silica

Peizi Li<sup>a</sup>, Kuanhong Cao<sup>a</sup>, Xiaobi Jing<sup>a</sup>, Yonghong Liu<sup>a,\*</sup>, and Lei Yu<sup>a,\*</sup>

<sup>a</sup>School of Chemistry and Chemical Engineering, Yangzhou University, Yangzhou,

Jiangsu 225002, China

Fax: +86 514 87975244; Tel: +86 136 65295901; Emails: [yhliu@yzu.edu.cn](mailto:yhliu@yzu.edu.cn) (Y. Liu);  
[yulei@yzu.edu.cn](mailto:yulei@yzu.edu.cn) (L. Yu)

### CONTENTS

|                                                                      |    |
|----------------------------------------------------------------------|----|
| FT-IR spectra of the materials.....                                  | S2 |
| XRD patterns of the materials.....                                   | S3 |
| XPS details.....                                                     | S4 |
| XPS spectrum of Se/SiO <sub>2</sub> -F on F.....                     | S4 |
| EDX spectrum of Se/SiO <sub>2</sub> -F.....                          | S5 |
| <sup>1</sup> H NMR data and spectrum of $\beta$ -ionone epoxide..... | S6 |

## FT-IR spectra of the materials

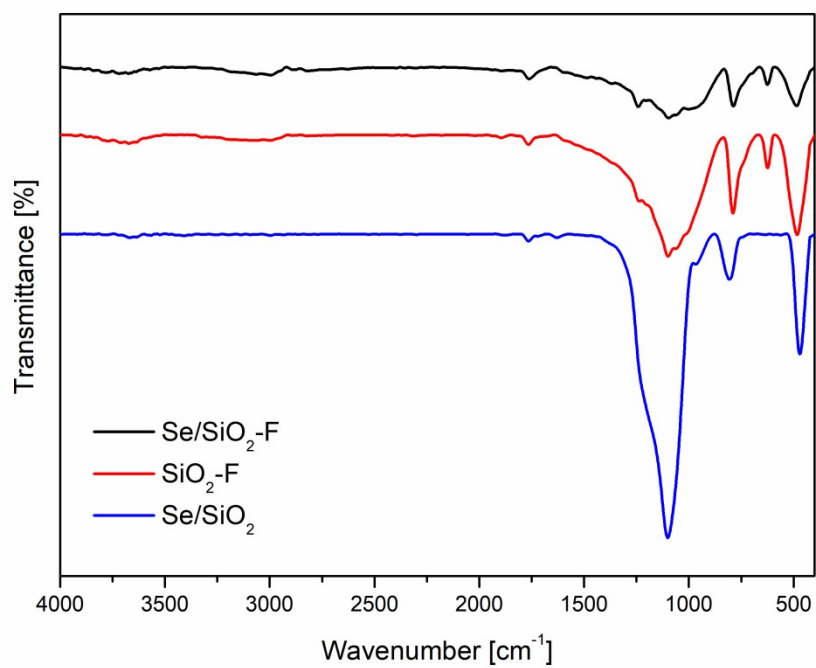

**Fig. S1.** FT-IR spectra of the materials.

## XRD patterns of the materials

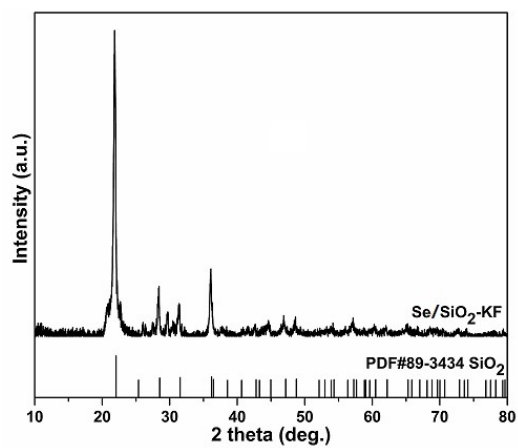

**Fig. S2.** XRD pattern of Se/SiO<sub>2</sub>-KF.

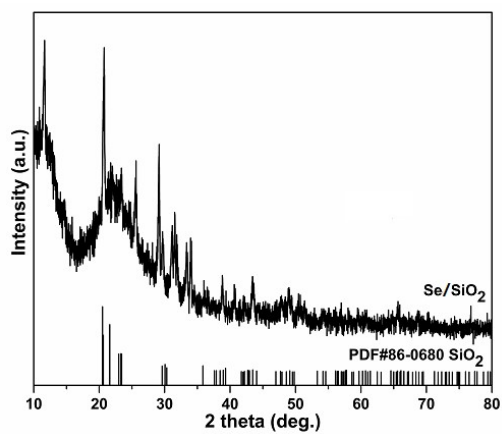

**Fig. S3.** XRD pattern of Se/SiO<sub>2</sub>.

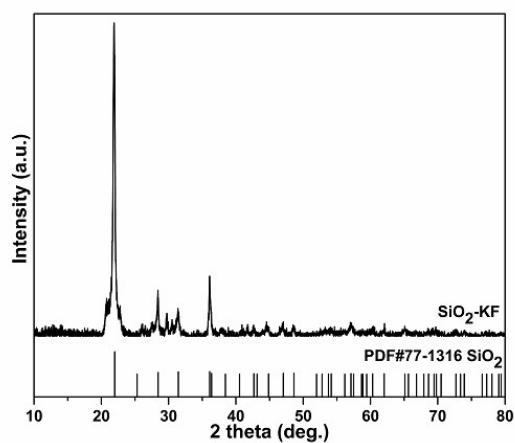

**Fig. S4.** XRD pattern of SiO<sub>2</sub>-KF.

## XPS details

ESCALAB 250Xi of Thermo Fisher Scientific with mono Al K $\alpha$  (1486.6 eV) was employed. When the neutralization gun was turned on in the whole process, the test beam spot size was 500  $\mu\text{m}$  under standard mode (CAE). Full spectrum passing energy was 150 eV, with step size at 1.0 eV; Narrow spectrum passing energy was 30 eV, with step size at 0.05 eV. The sample was pre-vacuumized to  $2.0 \times 10^{-8}$  mbar in the injection chamber and transferred to the analysis chamber of  $9.0 \times 10^{-10}$  mbar step by step. In the actual test, the vacuum was  $3.0 \times 10^{-7}$  mbar because the neutralization gun was turned on.

| Chemical state   | Binding energy Si 2p/eV |
|------------------|-------------------------|
| Organic Si       | 102 (References:1)      |
| SiO <sub>2</sub> | 103.5 (References:1)    |

| Chemical state   | Binding energy Se 3d/eV |
|------------------|-------------------------|
| Se               | 55.2 (Ref. 1)           |
| Se <sup>4+</sup> | 59.07 (Ref. 2)          |

References:

1. <https://srdata.nist.gov/xps/selEnergyType.aspx>
2. S. Zhu, J. Hu, S. Liu. Carbohydr. Polym. 246 (2020) 116545.

## XPS spectrum of Se/SiO<sub>2</sub>-F on F

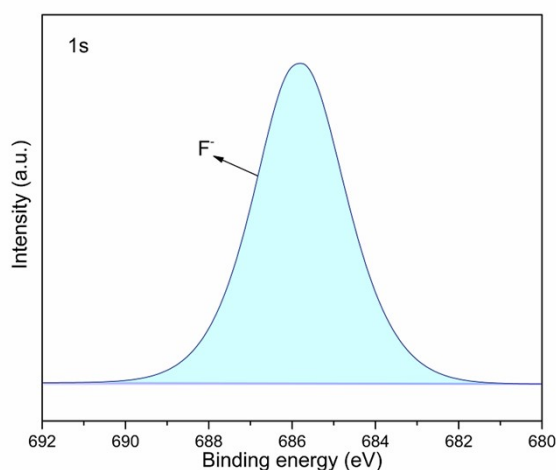

**Fig. S5.** XPS spectrum of Se/SiO<sub>2</sub>-F on F.

### EDX spectrum of Se/SiO<sub>2</sub>-F

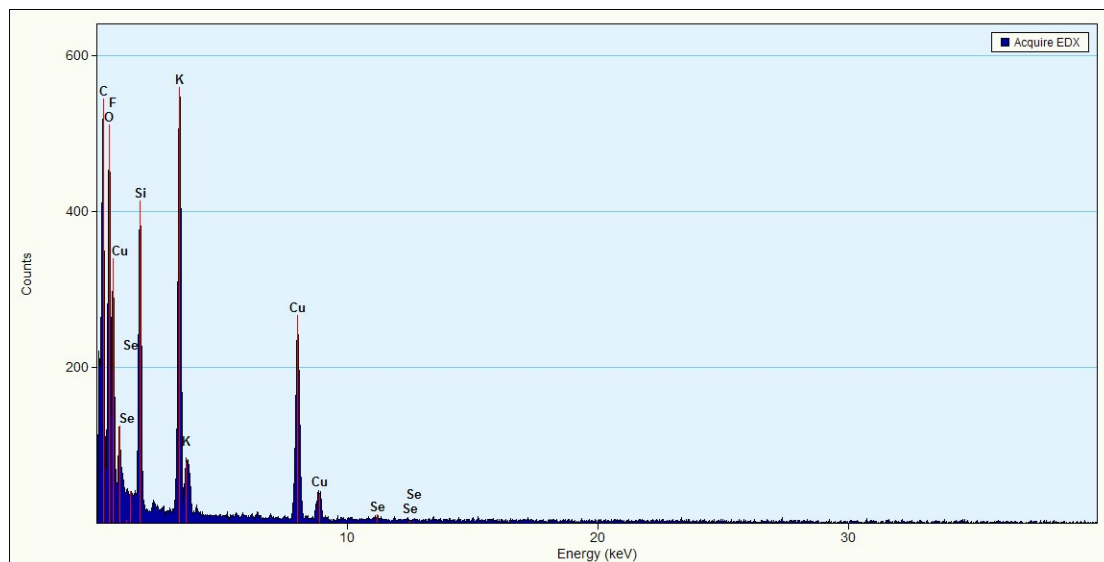

**Fig. S6.** EDX spectrum of Se/SiO<sub>2</sub>-F.

### **<sup>1</sup>H NMR data and spectrum of $\beta$ -ionone epoxide**

<sup>1</sup>H NMR (400 MHz, CDCl<sub>3</sub>)  $\delta$  7.00 (d,  $J$  = 15.7 Hz, 1H), 6.27 (d,  $J$  = 15.6 Hz, 1H), 2.26 (s, 3H), 1.88 (dq,  $J$  = 9.9, 7.9 Hz, 1H), 1.74 (dt,  $J$  = 14.7, 5.3 Hz, 1H), 1.48 – 1.37 (m, 3H), 1.13 (s, 6H), 1.06 (ddd,  $J$  = 10.9, 5.3, 2.2 Hz, 1H), 0.92 (s, 3H). Known product [Catal. Sci. Technol. 8 (2018) 5017–5023].

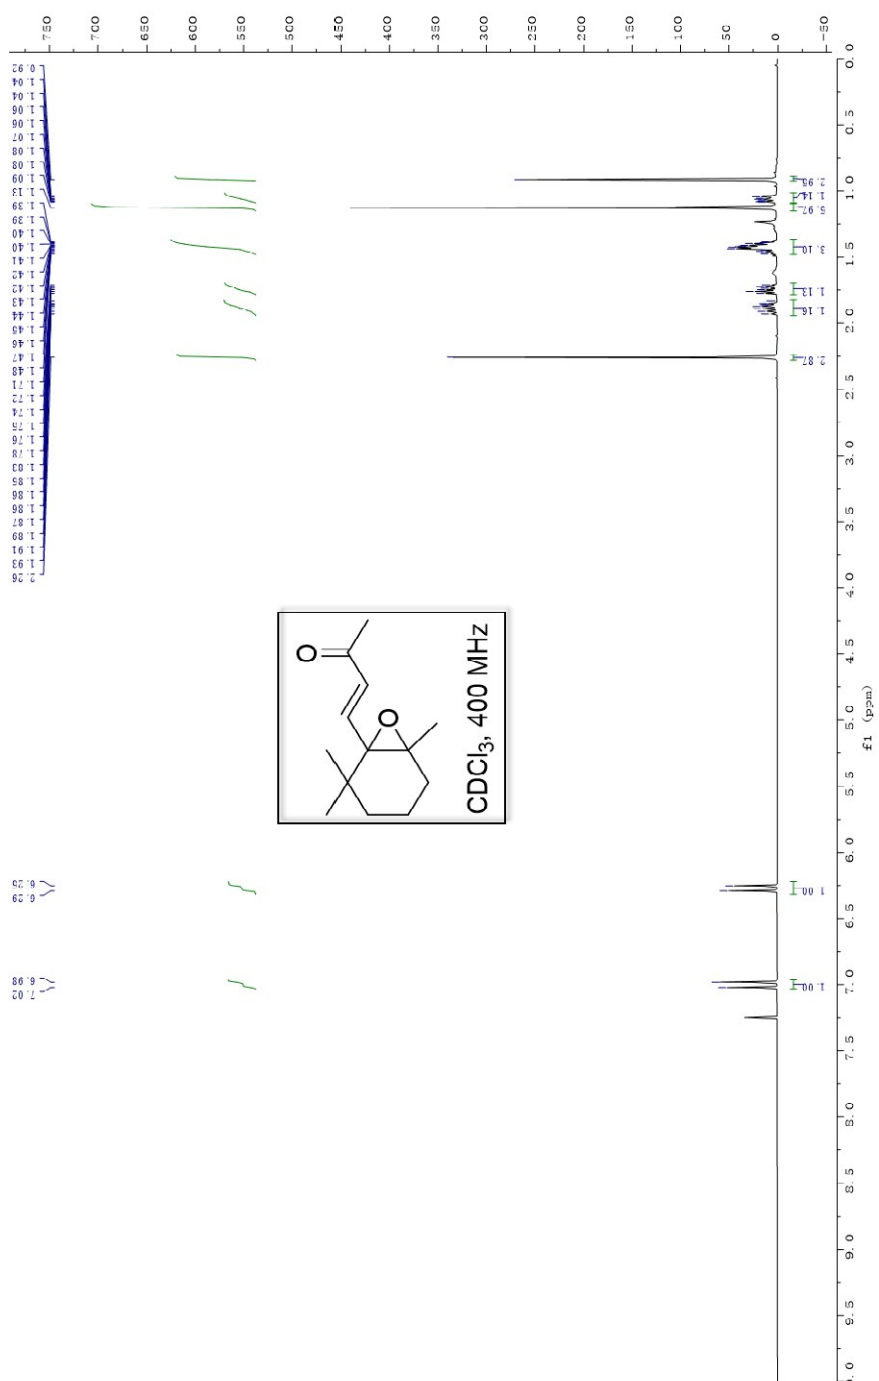

Supplement: d1nj03311e1.pdf [file d1nj03311e1.pdf]
